# Supplementary material for: Clinical Mass Spectrometry Discovered Human IgG Sialylation as a Potential Biosignature for Kidney Function
Source: MDPI journal article supplement (doi:10.3390/jpm11080761), 2021-07-31
Supplement: s1 [file s1]

**Supplemental Table S1.** Analytes monitored in the study by using UHPLC-MS/MS. Peptides represent total IgG, IgG1, IgG2, IgG3, and IgG4 were used to monitor the protein amounts in plasma. Correlation coefficients ( $r$ ) of calibration curves are listed in the table.

| Analyte              | Q1 <sup>a</sup> | Q2    | $r$   |
|----------------------|-----------------|-------|-------|
| (1) H4N4F1-IgG1      | 932.8           | 204.1 | 0.978 |
| (2) H5N4F1-IgG1      | 986.8           | 366.1 | 0.978 |
| (3) H3N4F1-IgG1      | 878.8           | 204.1 | 0.978 |
| (4) H4N4-IgG1        | 884.1           | 204.1 | 0.975 |
| (5) H5N4-IgG1        | 938.1           | 366.1 | 0.975 |
| (6) H4N5F1-IgG1      | 1000.5          | 204.1 | 0.978 |
| (7) H3N5F1-IgG1      | 946.5           | 204.1 | 0.973 |
| (8) H5N5F1-IgG1      | 1054.5          | 366.1 | 0.976 |
| (9) H4N5-IgG1        | 951.7           | 204.1 | 0.977 |
| (10) H5N4F1S1-IgG1   | 1083.8          | 366.1 | 0.978 |
| (11) H4N4F1S1-IgG1   | 1029.8          | 204.1 | 0.980 |
| (12) H3N4F1-IgG3/4   | 873.4           | 204.1 | 0.997 |
| (13) H4N4F1-IgG3/4   | 927.4           | 204.1 | 0.987 |
| (14) H3N5F1-IgG3/4   | 941.1           | 204.1 | 0.981 |
| (15) H4N5F1-IgG3/4   | 995.1           | 204.1 | 0.982 |
| (16) H5N4F1S1-IgG3/4 | 1078.4          | 366.1 | 0.975 |
| (17) H5N4F1-IgG2     | 976.1           | 366.1 | 0.990 |
| (18) H5N5F1-IgG2     | 1043.8          | 366.1 | 0.987 |
| (19) H4N4F1-IgG2     | 922.1           | 204.1 | 0.992 |
| (20) H4N5F1-IgG2     | 989.9           | 204.1 | 0.991 |
| (21) H4N4-IgG2       | 873.4           | 204.1 | 0.985 |
| (22) H4N5-IgG2       | 941.1           | 204.1 | 0.947 |
| (23) H3N4F1-IgG2     | 868.1           | 204.1 | 0.989 |
| (24) H3N5F1-IgG2     | 935.8           | 204.1 | 0.988 |
| (25) H5N4F1S1-IgG2   | 1073.1          | 366.1 | 0.979 |
| (26) H4N4F1S1-IgG2   | 1019.1          | 204.1 | 0.980 |
| IgG - DTLMISR        | 418.2           | 310.2 | 0.999 |
|                      |                 | 506.3 |       |
|                      |                 | 619.4 |       |
| IgG1 - GPSVFPLAPSSK  | 593.8           | 418.2 | 0.998 |
|                      |                 | 699.4 |       |
|                      |                 | 846.5 |       |

|                          |       |        |       |
|--------------------------|-------|--------|-------|
| IgG2 - GLPAPIEK          | 953.5 | 804.4  | 0.997 |
|                          |       | 852.4  |       |
|                          |       | 1150.5 |       |
| IgG3 - WYVDGVEVHNAK      | 472.9 | 484.7  | 0.999 |
|                          |       | 534.3  |       |
|                          |       | 697.4  |       |
|                          |       | 853.5  |       |
| IgG4 - TTPPVLDSDGSFFLYSR | 951.5 | 850.4  | 0.996 |
|                          |       | 1293.6 |       |
| DSTYSLSSTLTLSK (IS)      | 755.9 | 844.5  | NA    |
|                          |       | 957.6  |       |
|                          |       | 1044.6 |       |

---

<sup>a</sup> Q1 represents parent ions and Q2 represents product ions.

<sup>b</sup> IgG1 glycopeptide: glycan-EEQYNSTYR; H, hexose; N, N-acetylglucosamine; F, fucose; S, N-acetylneuraminic acid; IgG2 glycopeptide: glycan-EEQFNSTFR; IgG3/4 glycopeptide: glycan-EEQYNSTFR (IgG3); glycan-EEQFNSTYR (IgG4)

**Supplemental Table S2.** Characteristics of 57 participants in the study.

| Case number | Age | Gender | eGFR (mL/min/1.73m2) | Primary disease <sup>a</sup> |
|-------------|-----|--------|----------------------|------------------------------|
| 1           | 57  | M      | 21                   | GN                           |
| 2           | 29  | M      | 86                   | GN                           |
| 3           | 72  | F      | 88                   | GN                           |
| 4           | 62  | M      | 55                   | GN                           |
| 5           | 60  | F      | 91                   | GN                           |
| 6           | 68  | F      | 67                   | HTN                          |
| 7           | 60  | F      | 78                   | GN                           |
| 8           | 64  | M      | 59                   | GN                           |
| 9           | 72  | F      | 75                   | GN                           |
| 10          | 64  | F      | 68                   | GN                           |
| 11          | 71  | M      | 30                   | DMN, HTN                     |
| 12          | 68  | M      | 71                   | GN                           |
| 13          | 53  | M      | 68                   | HTN                          |
| 14          | 59  | M      | 56                   | GN                           |
| 15          | 69  | F      | 34                   | DMN, HTN                     |
| 16          | 71  | F      | 58                   | GN                           |
| 17          | 57  | F      | 79                   | HTN                          |
| 18          | 69  | F      | 67                   | GN                           |
| 19          | 34  | M      | 35                   | DMN, HTN                     |
| 20          | 72  | F      | 105                  | Non-CKD                      |
| 21          | 66  | F      | 171                  | Non-CKD                      |
| 22          | 59  | M      | 106                  | Non-CKD                      |
| 23          | 58  | F      | 92                   | Non-CKD                      |
| 24          | 69  | M      | 79                   | Non-CKD                      |
| 25          | 68  | M      | 79                   | Non-CKD                      |
| 26          | 69  | F      | 76                   | Non-CKD                      |
| 27          | 68  | F      | 59                   | Non-CKD                      |
| 28          | 52  | M      | 75                   | Non-CKD                      |
| 29          | 27  | M      | 108                  | Non-CKD                      |
| 30          | 29  | F      | 108                  | GN                           |
| 31          | 39  | F      | 45                   | HTN                          |
| 32          | 38  | F      | 120                  | GN                           |
| 33          | 43  | M      | 25                   | HTN                          |
| 34          | 40  | M      | 23                   | HTN                          |

|    |    |   |     |          |
|----|----|---|-----|----------|
| 35 | 65 | F | 77  | HTN      |
| 36 | 64 | M | 104 | GN       |
| 37 | 67 | M | 68  | DMN      |
| 38 | 53 | M | 29  | GN       |
| 39 | 73 | M | 15  | DMN, HTN |
| 40 | 52 | M | 57  | GN       |
| 41 | 66 | M | 65  | GN       |
| 42 | 76 | M | 33  | GN       |
| 43 | 68 | M | 65  | DMN      |
| 44 | 71 | M | 23  | GN       |
| 45 | 72 | M | 53  | DMN, HTN |
| 46 | 63 | M | 41  | HTN      |
| 47 | 45 | M | 41  | GN       |
| 48 | 66 | M | 34  | DMN, HTN |
| 49 | 55 | F | 33  | DMN, HTN |
| 50 | 75 | M | 35  | DMN, HTN |
| 51 | 44 | M | 19  | HTN      |
| 52 | 40 | M | 66  | GN       |
| 53 | 59 | M | 60  | DMN      |
| 54 | 53 | M | 56  | HTN      |
| 55 | 49 | M | 57  | HTN      |
| 56 | 73 | F | 87  | Non-CKD  |
| 57 | 64 | F | 77  | Non-CKD  |

---

<sup>a</sup> GN: glomerulonephritis; DMN: diabetic nephropathy; HTN: hypertension; CKD: chronic kidney disease.

**Supplemental Table S3.** Results of correlation analysis of natural abundances and normalized abundances of 26 IgG glycopeptides to the eGFR values.

| Glycopeptides        | Natural abundance |          | Normalized abundance |          |
|----------------------|-------------------|----------|----------------------|----------|
|                      | <i>r</i>          | <i>p</i> | <i>r</i>             | <i>p</i> |
| (1) H4N4F1-IgG1      | 0.4372            | 0.0008   | 0.1838               | 0.1752   |
| (2) H5N4F1-IgG1      | 0.3844            | 0.0034   | 0.1104               | 0.4178   |
| (3) H3N4F1-IgG1      | 0.2715            | 0.0430   | 0.1027               | 0.4513   |
| (4) H4N4-IgG1        | 0.1823            | 0.1788   | -0.0860              | 0.5293   |
| (5) H5N4-IgG1        | 0.1155            | 0.3967   | -0.1181              | 0.3861   |
| (6) H4N5F1-IgG1      | 0.3191            | 0.0165   | 0.0667               | 0.6254   |
| (7) H3N5F1-IgG1      | 0.2275            | 0.0918   | -0.0028              | 0.9834   |
| (8) H5N5F1-IgG1      | 0.3188            | 0.0166   | 0.0349               | 0.7982   |
| (9) H4N5-IgG1        | 0.3892            | 0.0030   | 0.1504               | 0.2685   |
| (10) H5N4F1S1-IgG1*  | 0.3926            | 0.0028   | 0.2501               | 0.0630   |
| (11) H4N4F1S1-IgG1*  | 0.4538            | 0.0004   | 0.3727               | 0.0047   |
| (12) H3N4F1-IgG3/4   | 0.1412            | 0.2991   | -0.0835              | 0.5407   |
| (13) H4N4F1-IgG3/4   | 0.2358            | 0.0802   | 0.1771               | 0.1916   |
| (14) H3N5F1-IgG3/4   | 0.1434            | 0.2919   | -0.1090              | 0.4239   |
| (15) H4N5F1-IgG3/4   | 0.2601            | 0.0529   | 0.0466               | 0.7329   |
| (16) H5N4F1S1-IgG3/4 | 0.2452            | 0.0686   | 0.0797               | 0.5593   |
| (17) H5N4F1-IgG2     | 0.3248            | 0.0146   | 0.0206               | 0.8801   |
| (18) H5N5F1-IgG2     | 0.2995            | 0.0250   | 0.0448               | 0.7433   |
| (19) H4N4F1-IgG2     | 0.3510            | 0.0080   | 0.2104               | 0.1196   |
| (20) H4N5F1-IgG2     | 0.3189            | 0.0166   | 0.0679               | 0.6192   |
| (21) H4N4-IgG2       | 0.3394            | 0.0105   | 0.0373               | 0.7847   |
| (22) H4N5-IgG2       | 0.3406            | 0.0102   | 0.1604               | 0.2376   |
| (23) H3N4F1-IgG2     | 0.3246            | 0.0146   | 0.0853               | 0.5321   |
| (24) H3N5F1-IgG2     | 0.3357            | 0.0114   | 0.0280               | 0.8377   |
| (25) H5N4F1S1-IgG2   | 0.3636            | 0.0059   | 0.1290               | 0.3435   |
| (26) H4N4F1S1-IgG2   | 0.3981            | 0.0024   | 0.1724               | 0.2038   |

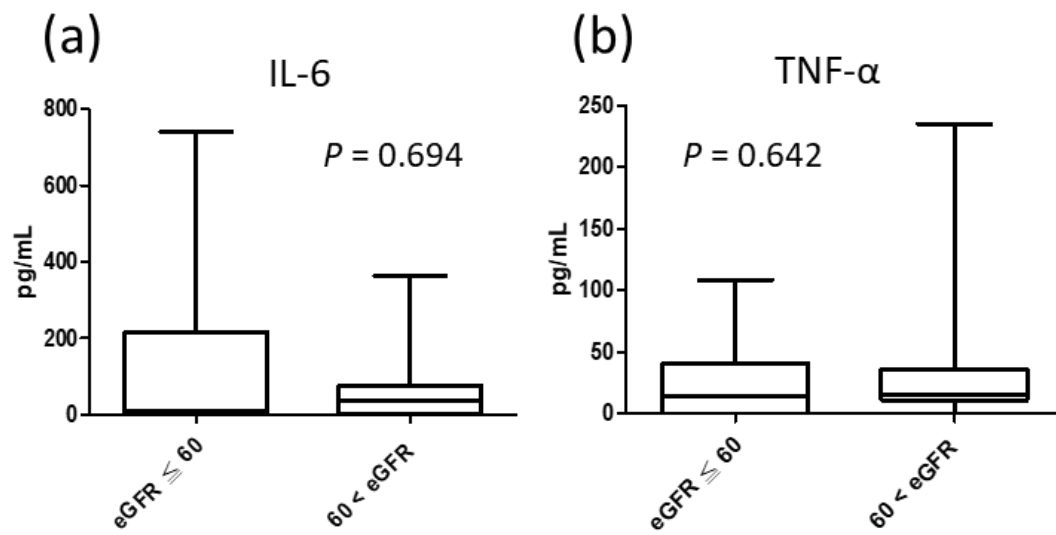

**Supplemental Figure S1.** Statistical analysis of plasma concentrations of IL-6 (a) and TNF- $\alpha$  (b) between groups with eGFR values lower and higher than 60 mL/min/1.73 m<sup>2</sup>.
